# 1 **Green microalga *Trebouxia* sp. produces strigolactone-** 2 **related compounds**

3  
4 Smýkalová I.<sup>1</sup>, Ludvíková M.<sup>1</sup>, Ondráčková E.<sup>1</sup>, Klejdus B.<sup>2</sup>, Bonhomme S.<sup>3</sup>, Kronusová O.<sup>4</sup>,  
5 Soukup A.<sup>5</sup>, Rozmoš M.<sup>6</sup>, Guzow-Krzemińska B.<sup>7</sup>, Matúšová R.<sup>8</sup>

6  
7 *1 Agritec Plant Research Ltd., Zemědělská 16, Šumperk, 787 01, Czech Republic;*

8 *2 Department of Chemistry and Biochemistry, Mendel University in Brno, Zemědělská 1,*  
9 *Brno, 613 00 Brno, Czech Republic;*

10 *3 Institut Jean-Pierre Bourgin, INRA, AgroParisTech, CNRS, Université Paris-Saclay, Route*  
11 *de St-Cyr 10, 780 26 Versailles Cedex, France.*

12 *4 Ecofuel Laboratories Ltd., Ocelářská 9, 190 02 Prague, Czech Republic;*

13 *5 Department of Experimental Plant Biology, Faculty of Science Charles University in*  
14 *Prague, Viničná 5, 128 44 Prague 2, Czech Republic;*

15 *6 Institute of Experimental Biology, Faculty of Plant Science, Masaryk University, Kotlářská*  
16 *267/2, Brno, 611 37, Czech Republic;*

17 *7 Department of Plant Taxonomy and Nature Conservation, Faculty of Biology, University*  
18 *of Gdańsk, Wita Stwosza 59, 80-308 Gdańsk, Poland;*

19 *8 Plant Science and Biodiversity Center SAS, Institute of Plant Genetics and Biotechnology,*  
20 *Akademická 2, PO Box 39A, 95007 Nitra, Slovak Republic;*

21  
22 Corresponding authors: [smykalova@agritec.cz](mailto:smykalova@agritec.cz); [Radka.Matusova@savba.sk](mailto:Radka.Matusova@savba.sk)

## 23 **Running title**

24 Production of SLs in microalga

## 25 **Highlight**

26 In lichenized alga *Trebouxia arboricola* there are produced SLs-related compounds inducing  
27 germination of parasitic weed *Phelipanche aegyptiaca*; *T. arboricola* stimulate growth of  
28 *Arabidopsis* roots and pea shoots; expression of SL-related genes in *P. patens*; carlactone  
29 detected in *T. arboricola*.

30 **Key words:** algae, carlactone, DESI-Imaging, SL-marker expression in moss, growth  
31 stimulation, photobionts *Trebouxiophyceae*, strigolactone-related compounds.

32 **Abbreviations**

|                 |                                                           |
|-----------------|-----------------------------------------------------------|
| 33 PpCCD7       | <i>Physcomitrella patens</i> CCD7                         |
| 34 SL           | Strigolactone                                             |
| 35 GR24         | Synthetic strigolactone analog                            |
| 36 DESI-MSI     | Mass Spectrometry Imaging                                 |
| 37 HPLC         | High Performance Liquid Chromatography                    |
| 38 MRM-LC-MS/MS | Monitoring-liquid Chromatography-tandem Mass Spectroscopy |

39 **Abstract**

40 Different algal species that may have germination inducing activity of holoparasitic  
41 broomrape weeds *Phelipanche aegyptiaca* and *P. ramosa* seeds were screened through  
42 germination bioassay. Green alga produce SL-related compounds. Applied extracts of  
43 biomass obtained from the culture of green alga *Trebouxia arboricola* increased seeds  
44 germination of both parasites. An optimization of the alga extraction led to an increase of *P.*  
45 *aegyptiaca* germination. Exhausted medium also contained SL-related compounds. The crude  
46 extract stimulated the roots length of *Arabidopsis thaliana* tested *in vitro*. A similar effect had  
47 the algae and GR24 applications on expression levels of the SL-related genes in *Physcomitrella*  
48 *patens*. The novel analytical method DESI-MSI detected production of carlactone in the  
49 algae. The *Trebouxia* sp. culture applications in pot experiments had positive effect on growth  
50 characteristics of pea plants.

51 **Introduction**

52 The first report about the production of some compounds stimulating seed germination  
53 of obligatory root parasites: whichweed *Striga lutea*, broomrapes (*Orobanche* and  
54 *Phelipanche* spp.), and *Alectra* spp., has already been published in 1966 (Cook *et al.*, 1972).  
55 These compounds were recognized as growth stimulating factors exuded by host plant roots,  
56 later named strigolactones (Akiyama and Hayashi, 2006). The strigolactones (SLs) are the  
57 carotenoid-derived terpenoid lactone compounds produced in plant root tissues at low  
58 concentrations ( $10^{-13}$  M). The SLs are derived from carotenoids (Matusova *et al.*, 2005), a  
59 group of physiologically important compounds with conjugated double bond system  
60 synthesized by all photosynthetic organisms. SLs appeared in other part of plants such as  
61 hypocotyls, stems and leaves (Yoneyama *et al.*, 2007). Strigolactones were recognized as  
62 novel plant growth hormones acting similarly to auxins, controlling shoot branching (Gomez-  
63 Roland *et al.*, 2008, Umehara *et al.*, 2008). The primary functions of SLs are inhibition of

64 outgrowth of axillary buds into branches, stimulation of root branching in the plant (Brewer *et*  
65 *al.*, 2013), and they have a great impact on plant architecture which corresponds with long-  
66 distance transport of SLs (Kohlen *et al.*, 2011). The second important role is the stimulation  
67 of spore germination and hyphal branching of arbuscular mycorrhizal (AM) fungi by  
68 exudation of trace amounts of unstable SLs from roots of plants into rhizosphere (Besserer *et*  
69 *al.*, 2006, Bouwmeester *et al.*, 2007). GR24, a synthetic analog of strigolactones is the most  
70 extensively used SL analog in strigolactone research. Both production and exudation of SLs is  
71 increased in plants under stress conditions as nutrient deficiency, namely phosphorus  
72 limitation (Yoneyama *et al.*, 2007). These facts suggest a great problem mainly in Africa, and  
73 possible invasive expansion of parasitic plants into Mediterranean areas of Europe (Chauhan  
74 and Mahajan, 2014). The current knowledge about strigolactones implies no sufficient  
75 biological nor economic resolutions to solving this problem.

76 For the determination and study of structures of natural SLs in plants, the hydroponic  
77 system (cultivation of seedlings in liquid medium) is preferred. The root exudates or root  
78 extracts containing SLs are collected and concentrated (SPE C18 Cartridge) (Yoneyama *et al.*,  
79 2012). The extracts or exudates are fractioned by HPLC and endogenous SLs are identified by  
80 multiple reaction MRM-LC-MS/MS. The disadvantage of SLs is inherently their instability  
81 in aqueous solutions and also in solvents such as metanol. The biological activity of SLs  
82 strongly depends on stereochemistry (Zwanenburg and Pospíšil, 2013). The SL signaling  
83 requires the hormone-dependent interaction of  $\alpha/\beta$  hydrolase DWARF14/D14 producing an  
84 intermediate molecule CLIM (De Saint Germain *et al.*, 2016, Yao *et al.*, 2016), F-box of  
85 protein MAX2/D3 (Hamiaux *et al.*, 2012, De Saint Germain *et al.*, 2013), transcription  
86 regulator with proteolytic function SMXL7/D53 (Bennet *et al.*, 2016) and an unknown  
87 transcription factor (Li *et al.*, 2017). Several mutants of *Arabidopsis thaliana*, *Pisum sativum*,  
88 *Oryza sativa*, *Zea mays*, *Petunia hybrida* and *Physcomitrella patens* were used to identify  
89 SLs biosynthesis and signal transduction.

90 Carlactone is an endogenous biosynthetic precursor for strigolactones (Alder *et al.*,  
91 2012, Seto *et al.*, 2014). In plant kingdom, there are three families of naturally occurring SLs,  
92 strigol-type, orobanchol type, and other SLs-like compounds, which are derived from the  
93 molecule of carlactone. The carlactone is easily oxidated by the enzyme MAX1, a cytochrome  
94 P450, to produce carlactonic acid and methyl carlactonoate (Abe *et al.*, 2014). This confirmed  
95 that carlactone is a precursor of wide variety of SLs-like molecules.

96 The soil algal biomass varies from 0 to  $10^8$  cells  $g^{-1}$  soil (dw), mean value is calculated  
97 as  $10 \text{ kg ha}^{-1}$  and the highest mean abundance of algal cells occurs in the 0 - 2 cm soil layer.  
98 The main characteristics of soil algae are an excretion of organic acids that increase P-  
99 availability and P-uptake, provision of nitrogen by biological nitrogen fixation, increase in  
100 soil organic matter, production and release of bioactive extracellular substances that may  
101 influence plant growth and biosynthesis of plant growth regulators, crust formation,  
102 biofertilizers and biopesticides, stabilization of soil aggregation by extracellular  
103 polysaccharides of soil aggregate and accumulation of metal ions present in their environment.  
104 Blue-green algae, especially the nitrogen-fixing cyanobacteria *Nostoc muscorum*, *N.*  
105 *caldicola*, *N. piscinale*, *Anabena sp.*, *A. oryzae*, *Microchaete tenera*, *Cyellindrospermum*  
106 *muscicola* and others represent the major microorganisms which contribute to soil fertility  
107 (Abdel-Raouf N. *et al.*, 2012). The microalgae, a group of evolutionary old group of living  
108 organisms on the Earth, represent a large-scale „gene memory“ of the plant kingdom. The  
109 photoautotrophic microalgal cells are mostly interesting organisms as a source of adaptive  
110 plasticity to changes in environment. In the unicellular algal population communication  
111 network between cells could exist before occurrence and maintain cell-cell connection leading  
112 to the multicellular phenotype such as displayed at charophytes, for example soil filamentous  
113 cyanobacterium *Klebsormidium flaccidum* (Hori *et al.*, 2014). The multicellularity  
114 phenomenon is based on the composition of cell wall (Domozych and Domozych, 2014). The  
115 evolution hypothesis, that the Charophytes shifted to adapt in terrestrial habitats by  
116 production and branching ability of rhizomes connecting with the SLs production was  
117 reported (Ruyter-Spira and Bouwmeester, 2012). Only few reports bring out some  
118 information about strigolactones production in macro or microalgae. Delaux *et al.* (2012)  
119 reported no possibility to find SLs in microalgae due to lack of some genes of the SLs  
120 biosynthetic pathway. In the study of Delaux *et al.* (2012) SLs production was suggested only  
121 in case of branched macroalgae, such as *Nitella* and *Chara* (freshwater species). The  
122 occurrence of the key proteins of SLs pathways describing for vascular plants were analysed in  
123 representatives of chlorophyte green alga, Zygnematales, the Charales, the Bryophytes etc.  
124 (Delaux *et al.*, 2012). These are the compounds: D27, carotenoid cleavage dioxygenases  
125 (CCD) CCD7 and CCD8 (Alder *et al.*, 2012). However, the phylogenetic analysis of the CCD  
126 sequences present in the databases from algae did not show the presence of such homologues,  
127 instead, only CCD7 and CCD8 homologues have been identified (Ahrazem *et al.*, 2016). The

128 CCDs are enzymes that are responsible for the oxidative cleavage of carotenoids at specific  
129 double bond to generate apocarotenoides. These enzymes are found in animals, plants,  
130 photosynthetic bacteria, algae and cyanobacteria. C<sub>13</sub> volatile apocarotenoids produced by  
131 marine macroalgae exhibit growth-regulating properties (Baldermann *et al.*, 2013).  
132 Cyanobacterial CCDs from genera such as *Synechocystis* and *Nostoc*, as well as *Anabaena*,  
133 have not been well studied yet. Heo *et al.* (2013) have documented abundance of 3 CCDs  
134 (NSC1-3) in cyanobacteria *Nostoc* sp. PCC7120. The NSC3 cleaves  $\beta$ -apo-8'-carotenal,  
135 NSC2 moreover  $\beta$ -carotene, NSC1 cleaves different substrates of bicyclic and monocyclic  
136 carotenoids. This point out, that the enzymatic cleavage reactions of carotenoides or  
137 apocarotenoides catalyzed by various CCDs (Walter and Strack, 2011) are the most important  
138 to determinate novel SL-related compounds in algae.

139 Only a few studies have been conducted with SLs or SL-related compounds in algae. The  
140 main objective of this study was investigation of the microalgal strains that could be suitable  
141 for biotechnological purposes and of the agricultural importance (application benefit for the  
142 crop) in pest management including suicidal germination of parasitic weeds.

143

## 144 **Materials and methods**

### 145 *Plant material - screening*

146 Set of microalgae sp. obtained from algal collections (CALLA, CAUP, Czech Republic):  
147 *Amorphonostoc* sp., *Anabaena variabilis*, *A. eliposporum*, *Calothrix* sp. *Coleastrum* sp.,  
148 *Cylindrospermum alatosporum* CCALA 998, *Eustigmatos* sp., *Fischeriella* sp.,  
149 *Haematococcus pluvialis*, *Chlamydomonas reinhardtii* (2 strains), *Chlorococcum* sp.,  
150 *Chlorogloea* sp., *Chlorokybus atmophyticus*, *Klebsormidium flaccidum*, *Leptolyngbia* sp.,  
151 *Microthamnion strictissimum*, *Nanochloropsis* sp., *Nostoc calcicola*, *Nostoc muscorum*, *N.*  
152 *elliposporum*, *N. linckia f. piscinale*, *N. commune*, *N. sp. CM* (symbiont with GUNNERA),  
153 *Oscillatoria limosa*, *Phormidium* sp., *Scotiellopsis terrestris*, *Stichococcus bacillaris*,  
154 *Symploca thermalis*, *Synechocystis* sp., *Tribonema vulgare*, *Trichormus variabilis*,  
155 *Trochodiscus* sp., *Vicheria* sp., the symbiotic algae with fungi in lichens - *Trebouxia* sp.  
156 *Asterochloris* sp., *Trentepohlia aurea*, and the algae obtained by free natural sampling:  
157 freshwater macroalga - *Cladophora* sp. and *Chara* sp. (2 isolates), the freshwaterweed  
158 *Elodea canadensis* (intermediate between macroalga and plant) and the marine macroalgae -  
159 *Codium* sp., *Gracilaria dura*, *G. Bornea*, *G. sp.*, *Cystoseira* sp., *Ulva lactuca* were screened.

160 The algal biomass was produced in cultivation tubes with volume from 500 to 2000 ml  
161 according to experiments. The algal biomass was separated by centrifugation (4500 rpm, 5  
162 min) from the medium, freeze dried and stored at room temperature until testing. The natural  
163 samples of algae and the waterweed *E. canadensis* were dried at room temperature. Some of  
164 the isolates were tested immediately after collection.

165 In vitro axenic culture of *Trebouxia arboricola* (University of Gdańsk, Poland, strain  
166 XPAL450 isolated from *Xanthoria parietina*) and *Trebouxia erici* (strain UTEX911, USA =  
167 *Asterochloris erici* strain H1005, CAUP Czech Republic) were used for the optimization of  
168 the germination bioassays. The strain UTEX911 was isolated from lichen *Cladonia cristatella*  
169 from soil (Massachusetts USA 1958). The both strains were batch cultivated in Erlenmayer  
170 vessels (125 ml) on shaker (150 rpm) at illumination  $200 \mu\text{E}\cdot\text{m}^{-2}\cdot\text{s}^{-1}$  (cool-white fluorescent  
171 lamps) at 23 °C for 14 days. The cultures were cultivated without source of anorganic  
172 phosphorus for the last 3 - 4 days. The growth of the *Trebouxia* culture was enhanced by  
173 addition of 1% glucose (w/v) to the culture medium (Zachleder and Šetlík, 1982), pH 7.8.

#### 174 *Preparation of crude extracts for screening*

175 The 200 mg of dry biomass (freeze dried) or fresh algal samples were extracted by 3 ml of  
176 organic solvents: 70% (v/v) methanol, 100% acetone or 100% ethyl acetate, in mortar and  
177 pestle with quartz sand. The homogenate was allowed to stand for 20 min in closed tube and  
178 centrifugated at 4500 rpm for 5 min and at 4 °C. The extraction was repeated twice, extract  
179 combined and stored at - 20 °C until use.

#### 180 *Germ tube branching bioassay on the AM fungus Gigaspora rosea*

181 Arbuscular mycorrhizal fungus *Gigaspora rosea* T.H. (Nicholson and Schenck, 1979) was  
182 used in the experiment. Treatment solutions were prepared by dilution of algal extracts in a  
183 ratio of 1:75 (v/v) with sterile distilled water. The 50 mm plastic Petri dishes were placed on  
184 50 mm nitrocellulose membranes Pragozor (Pragochema, Czech Republic) supported by 70  
185 mm cellulose discs, each saturated with 1500  $\mu\text{l}$  of the test solution. The prepared dishes were  
186 left open for one hour at room temperature. Subsequently, 10 - 13 spores of AM sponges were  
187 inoculated on each nitrocellulose membrane using an automatic pipette. Petri dishes were  
188 placed in a humid chamber and incubated for 8 - 21 days at 28 °C. For evaluation, both  
189 nitrocellulose membranes and cellulose discs were perfused with a solution of 5 % ink (v/v)  
190 and 5% vinegar (v/v) in water. Spinning spores were counted using a preparative microscope  
191 and the result is given as a percentage of germinated spores.

192 *Germination of seeds of parasitic plants - in vitro bioassay*

193 *In vitro* bioassays were performed by methods described in Matusova *et al.* (2004). The seeds  
194 of *Phelipanche aegyptiaca* and *P. ramosa* were surface sterilized in 2% (v/v) solution of  
195 sodium hypochlorite containing 0.02% Tween-20 (v/v) for 5 min and rinsed several times  
196 with sterile distilled water. After surface sterilization the seeds of *Phelipanche* spp. were  
197 placed onto glass fiber filter paper discs (120 mm in diameter, approximately 50 seeds per  
198 disc) onto wetted filter paper in Petri dishes, sealed with parafilm and the seeds were  
199 preconditioned at 21°C for 12 days in the dark in the growth chamber. After preconditioning  
200 phase, discs with the seeds were transferred onto discs with testing solution (“sandwich”) in  
201 new Petri dishes. Preparation of treatment solution was based on a volume 500 µl of  
202 concentrated crude extract. The solvent was evaporated under vacuum pump, dissolved in 100  
203 µl of acetone and diluted 10 or 100 times by distilled water. The experimental aliquote of 40  
204 µl of the tested algal extracts were applied on each disc. For each bioassay, distilled water and  
205 0.01 or 0.001 mg.l<sup>-1</sup> GR24 were negative and positive controls, respectively. The bioassays  
206 were repeated twice or three times. The germination of seeds was evaluated using light  
207 stereomicroscope (Carl Zeiss Jena, Germany), percentage of germination was calculated as  
208 number of germinated seeds from the total number of seeds.

209 *Roots analysis of Arabidopsis thaliana - in vitro bioassay*

210 The *Arabidopsis thaliana* seeds (wt Col 0) with 10% (v/v) sodium hypochloride and drop of  
211 Tween 20 for 5 min were sterilized. The seeds were 3-times washed with sterile distilled  
212 water and stratified for 3 days at 4 °C. 75 ml of MS medium (Murashige and Skoog, 1962)  
213 containing 1% agar (w/v), 1 g.l<sup>-1</sup> sucrose, pH 5.8 was poured into Petri plate (diameter 9 cm).  
214 The 6 seeds per plate were placed on the cultivation medium from the top margin of 1.5 cm.  
215 The excess of water was evaporated and the Petri plates were vertically stood at an 45°  
216 angle at illumination 200 µE.m<sup>-2</sup>.s<sup>-1</sup> (cool-white fluorescent lamps) and temperature 22±1 °C.  
217 The root systems were evaluated after 8 days by scanning of images (Scanner, 1200dpi,  
218 24bit), and root Analyzer (NIS-ELEMENTS, ver.3.22, LIM Prague, Czech republic).

219 *Short-term pots experiments*

220 In first experiment, buds outgrowth measurements were performed on rms-1 (*ccd8*) mutant of  
221 pea (*Pisum sativum* L.) cv. Tèrese (Rameau *et al.*, 1997). 120 µl of crude extract of microalga  
222 *Trebouxia arboricola* (extraction of 5 ml of fresh pelleted biomass, representing 100 ml of  
223 fresh culture was extracted by 6 ml ethyl acetate) and lichen *Xanthoria parietina* (1 g dry

224 biomass was extracted by 6 ml ethyl acetate) were prepared and the crude extracts were  
225 diluted ten times (T/10 and X/10). For the treatment solution there was taken 5  $\mu$ l of each  
226 crude extract into 5 ml of physiological buffer (2% PEG + 50% ethanol + 0.4% DMSO +  
227 0.1% acetone). In precultured pea plants (3 nodes), the first two buds of young seedlings and  
228 apex were cut. The 10  $\mu$ l of final treatment solution on the upper intact bud was applied. The  
229 physiological buffer and physiological buffer including 1  $\mu$ mol.l<sup>-1</sup> GR24 were used as  
230 negative and positive controls.

231 In second experiment, the seeds of pea cv. Terno were soaked by algal homogenate of *T.*  
232 *arboricola* (strain XPAL450). The algal homogenate in centrifuged tube prepared from pellet  
233 and 17 ml of distilled water was mixed with 20 pea seeds for 24h in dark at room temperature.  
234 The treated seeds were germinated, ten seeds per pot. The pea plants were cultivated in 7-liter  
235 containers containing commercial garden soil (Agroprofi Garden, Agroc s.r.o., Czech  
236 Republic) and vermiculite (1:1). In experiment with AMF, the 15 g dose spore inoculum of  
237 *Rhizophagus irregularis* (Symbiom Ltd., Czech Republic) was incorporated into substrate  
238 mixture. All plants were grown in greenhouse at 22 $\pm$ 3 °C with the 16h photoperiod. The  
239 plants before flowering (mean 8 - 9 produced nodes per plant) were evaluated by germination  
240 rate, by determination of length (cm), fresh and dry weight of shoots (g), respectively.

#### 241 *Mass Spectrometry Imaging of carlactone and its derivatives*

242 The cell cultures of the alga *T. arboricola*  $\pm$  P-free were rinsed and concentrated by  
243 centrifugation. The 2  $\mu$ l of cell suspension was loaded onto a nylon membrane Nylon 66, 0.2  
244  $\mu$ m (Supelco, Bellefonte, PA). Nylon membrane was fixed to the glass slides (Prosolia,  
245 Indianapolis, IN) by the means of double-sided tape. DESI imaging analysis was performed  
246 using an OrbiTrap Elite (Thermo Fischer Scientific, Bremen, Germany) with a DESI-2D ion  
247 source (Prosolia, Indianapolis, IN). Imaging experiments were performed by continuous  
248 scanning of the surface. Spraying liquid (acetonitrile / 0.1% acetic acid mixture, v/v) at flow  
249 rate 3  $\mu$ l.min<sup>-1</sup>, scanning velocity 65  $\mu$ m.s<sup>-1</sup> and an 65° spray impact angle were used. Data  
250 were acquired in the mass range m/z 50 - 800. Typical time of the analysis was less than 120  
251 min. The obtained data were processed by the means of the BioMap software and two-  
252 dimensional ion images were created. Parameters of the MS analysis were optimised to  
253 following values: nebulizer pressure (N<sub>2</sub>): 7 bar, capillary heating: 300 °C, spray voltage: 5  
254 kV, lens voltage: 60 V, ion injection time: 400 ms. Two microscans were carried out for each  
255 pixel. DESI-MSI analysis was performed in positive ion mode for carlactone (m/z 303.195),



256 methyl carlactonoate ( $m/z$  347.184), carlactonoic acid ( $m/z$  333.169), 19-hydroxy carlactone  
257 ( $m/z$  319.191) and 19-oxo carlactone ( $m/z$  317.173).

258 *DART ambient technique*

259 DART-Standardized Voltage and Pressure Adjustable (SVPA) ion source with tweezer holder  
260 module (IonSense, Saugus, MA) was coupled to Orbitrap Elite mass spectrometer (Thermo  
261 Fischer Scientific, Bremen, Germany) through the interface evacuated by the diaphragm  
262 pump. The DART ion source was operated in the positive ion mode with helium ionizing gas  
263 at the pressure 0.65 MPa. The beam was heated in the temperature range 300 °C to 400 °C,  
264 the grid electrode voltage was in the range of 300 - 350 V. The parameters of the mass  
265 spectrometer were following: capillary voltage 50 V, tube lens voltage 100 V, skimmer  
266 voltage 18 V and capillary temperature in the range of 300 °C – 350 °C. The acquisition rate  
267 was set to 2 spectra.s<sup>-1</sup> with mass resolving power of 120,000 FWHM. All DART mass  
268 spectra were acquired over a mass range of  $m/z$  50-400. Xcalibur software (Thermo Fischer  
269 Scientific, Germany) with DART web-based module was used for the instrument operation,  
270 data acquisition and processing.

271 *RNA extraction and marker gene expression - Ppccd8 mutant of Physcomitrella patens*

272 The *Ppccd8* mutant (Proust *et al.*, 2011) has been used for the experiment. Transcript levels of  
273 SL response markers - PpCCD7 and Pp3c2\_34130v3.1 homologous to KAR-UP F-BOX1  
274 (KUF1) a SL response marker from *Arabidopsis* (Nelson *et al.* 2011, Lopez-Obando and  
275 Bonhomme, unpublished data) 6 or 16h after treatment based on published method (Lopez-  
276 Obando *et al.*, 2016) were obtained. Total RNA was extracted using QIAGEN RNeasy mini-  
277 kit with the column DNase treatment. Absence of DNA contamination was checked by PCR.  
278 CDNAs was prepared from 2 µg of each sample RT-qPCR for PpCCD7, Pp3c2\_34130v3.1,  
279 *PpACT3* and *PpAPT* genes. For gene expression analysis, genes were normalized against the  
280 mean of *PpACT3* and *PpAPT* genes (Lopez-Obando *et al.*, 2016). Preparation of dry ethyl  
281 acetate extracts from: microalgae *T. arboricola* grown in complete medium (*Trebouxia*) and  
282 in P-free medium for last 3 days of culturing (*Trebouxia*-P): 5 ml of fresh pelleted biomass,  
283 representing 100 ml of fresh culture, was extracted by 6 ml ethyl acetate; lichen *X. parientina*  
284 (*Xanthoria*): 1 g dry biomass was extracted by 6 ml ethyl acetate and 200 ml of exhausted  
285 culture medium of *T.arboricola* (Medium *Trebouxia*) was concentrated on silicon column  
286 C18 and eluated by 500 µl ethyl acetate. The crude extracts were stored at -20 °C. Preparation  
287 of dry samples and treatments solutions: 1000 µl ethyl acetate of each extract was evaporated

288 in vacuum, dry samples were resuspended in 120  $\mu\text{l}$  of acetone and diluted 1:9 with acetone.  
289 Bioactivity of 25  $\mu\text{l}$  tested extracts of *Trebouxia*, *Trebouxia*-P, *Xanthoria*, Medium *Trebouxia*  
290 and 10 times diluted the samples (T/10, X/10, MT/10 and T-P/10) on *Ppccd8* mutant grown  
291 for 6 or 16 hours from spores on 25 ml minimal PP-NO<sub>3</sub> medium (Hoffman et al. 2014,  
292 Ashton, 1979) were applied. The 25  $\mu\text{l}$  of acetone (negative control), 1  $\mu\text{mol.l}^{-1}$  GR24  
293 (positive control) were used.

#### 294 *Statistical analysis*

295 Results were analysed by analysis of variance Anova test  $p < 0.05$ , Statistica software  
296 Statistica ver.8.0 (StatSoft Inc. USA) followed by Tukey's and Kruskal-Wallis significance  
297 tests at the 5% level.

298

### 299 **Results and discussion**

300 Two antagonistic roles of SLs in the rhizosphere are known: 1) they facilitate the formation of  
301 symbioses with arbuscular mycorrhizal fungi, rhizoid elongation and branching, mainly under  
302 P-limitation; 2) they are signals for the parasitic weeds, such as the *Striga*, *Phelipanche* and  
303 *Orobanche* species, indicating the presence of a host species, resulting in devastating losses in  
304 some agricultural systems. Our study focused on cultureable strains of algae that potentially  
305 could help to eliminate parasitic weed seeds from the soil. First, we tested physiological  
306 effects of algae on germination rate of the parasitic seeds, on roots growth and AMF spores  
307 and mycelium development in different bioassays. Then we focused on detection and  
308 determination of SLs biosynthetic genes and SLs in algae. Finally, were tested the selected  
309 algal strain in pots experiment.

#### 310 *Screening of algae and plants for bioactivity - germination of seeds of parasitic plants*

311 The list of tested algae and plants represents a random selection in developmental line and it  
312 includes representatives of various families, especially green coccals, filamentous algae and  
313 cyanobacteria, representatives of marine and freshwater branched macroalgae, which are  
314 expected to synthesize SLs. Crude 70% (v/v) metanol, ethyl acetate or acetone extracts of  
315 algae (freeze-dried, dried or fresh, **Table 1**) were prepared. The results of germination  
316 bioactivities suggested an independence from position of developmental line (cyanobacteria,  
317 microalga, macroalga, marine or freshwaterweed) and filamentous or branched types. Our test  
318 using germination bioassay and ethyl acetate extraction have shown on the same bioactivity to  
319 SLs in filamentous freshwater Charales (*Chara* sp.) and Ulvophyceae (marine *Ulva lactuca*,

320 freshwater *Cladophora* sp.) macroalgae as was reported by Delaux *et al.* (2012). In addition  
321 the stimulation bioactivity of other marine branched macroalga *Cystoseira* sp., *Gracilaria* sp.,  
322 *Codium* sp., freshwaterweed *Elodea canadensis* was found.

323 The most important is the extraction procedure and the type of extraction agent. In sample of  
324 the *Cladophora* sp., germination inducing compounds were not extracted in 70% methanol, in  
325 comparison to ethyl acetate extract (**Table 2A**). Methanol as extraction agent was excluded  
326 for germination bioassays. Based on preliminary *P. aegyptiaca* germination bioactivity  
327 screening of macroalgae, lichens and water plant extracts, we further tested crude extracts  
328 obtained by ethyl acetate extraction, concentrated by evaporation of solvent, dissolved in  
329 small amount of acetone and diluted with water (1:9 v/v) (**Table 2B**).

330 Further we found that two soil cyanobacteria filamentous strains (soil and symbiotic) and four  
331 microalgae (symbiotic and one with flagella) stimulated the germination of the *P. aegyptiaca*.  
332 They were *Cylindrospermum alatosporum* (CCALA 998) and *Nostoc commune* (symbiotic  
333 with roots of Gunnera). The soil representatives of cyanobacteria form a spherical cell-free  
334 colony of cells, rich in carotenoids and able to N-fixation in heterocyst without the presence  
335 of oxygen. The lichenized algae: the carotenoid-rich red microalga *Trentepohlia aurea* is  
336 lichen growing on tree and rich on specific pigments, the most common photobiont genera  
337 *Asterochloris* and *Trebouxia* (green microalga cultures grown without fungi) as symbiont of  
338 many lichens. The other two selected strains *Eustigmatos* sp. water isolates from *Chara* sp.  
339 and flagellate green freshwater alga *Chlamydomonas* sp. stayed independent. In the study  
340 Delaux *et al.* (2012) cyanobacteria was not tested, but Heo *et al.* (2013) reported unique  
341 cleavage activity of NSC3, a CCD of *Nostoc* sp. strain PCC 7120.

342 The information about presence of genes associated with the biosynthetic pathway of  
343 strigolactones in microalgae is still missing. Delaux *et al.*, (2012) reported presence of putative  
344 homologous proteins of receptor D14 in *Klebsormidium* sp., CCD8 and receptor D14 in  
345 *Chlorokybus* sp. and CCD8 in *Trebouxiophyceae*. We tested the hypothesis that SLs could be  
346 also produced in microalgae. Unlike *Trebouxia* sp. and *Asterochloris* sp. at both common soil  
347 charophytic algae *Chlorokybus atmophyticus* and *Klebsormidium flaccidum* germination  
348 bioactivities for *P. aegyptiaca* were not observed. However, we can not rule out the inhibition  
349 of SLs biosynthesis in green algae (Delaux *et al.*, 2012) or specific germination induction of  
350 other parasitic weed seeds. More detailed study using other parasitic weed seeds and

351 analytical approach may help to answer this question. In addition, *K. flaccidum* synthesizes  
352 several plant hormones and gained many genes typical for land plants (Hori *et al.*, 2014).  
353 The branching function of SLs is accounted as original function in plants, in moss  
354 *Physcomitrella patens* (regulation of protonema branching), in Charales and in fungi. In *P.*  
355 *patens* SLs act as reminiscent sensing molecules used by bacteria to communicate one with  
356 each other (Proust *et al.* 2011). In unbranched filamentous microalgae and cyanobacteria, there  
357 is a mutual communication of individual cells as was reported also for green algae such as  
358 multicellular *Volvox globator* or the charophyte (Domozych and Domozych, 2014). A specific  
359 group, where two different kinds of organisms - algae and fungi communicate, are lichens. In  
360 our experiment we tested cyanobacteria, lichenised algae and lichen for bioactivity similar to  
361 SLs. **Fig. 1** shows the results of induction of germination of *P. aegyptiaca* seeds in the  
362 bioassay with crude extracts of *Trebouxiophyceae* algae (lichens photobiont from artificial  
363 culture). All the algal treatments increased the germination activity of the seeds. GR24 (100  
364  $\mu\text{mol.l}^{-1}$ ) treatments added to the alga extract restored the germination bioactivity similar to  
365 the GR24 alone treatment, this means that the algal extract didn't contained substances that  
366 inhibit GR24 effect. It seems, that lichen and lichenised algae contain SL-related compounds.  
367 We need to further optimise growing conditions, and/or an extraction procedure.

#### 368 *Trebouxia* cultures – optimization of in vitro bioassays

369 Based on the screening and the data of biostimulation activity of common lichen *Xanthoria*  
370 *parietina* and their photobionts *Trebouxiophyceae* algae (*Trebouxia* sp. syn. *Asterochloris*  
371 syn. *A. excentrica* UTEX1714 (USA); *A. erici* UTEX911 from lichen *Cladonia cristatella*  
372 (USA), *A. sp.* LEP30 (CZ), *T. arboricola* (PL) on the seeds of *P. aegyptiaca* we supposed,  
373 that the lichenized alga produce SL-related compounds or compounds with SL-like  
374 bioactivity. **Table 3** show data of germination rate (%) of seeds of two broomrapes *P.*  
375 *aegyptiaca* and *P. ramosa* in a presence of crude ethyl acetate extract of *Trebouxia* sp.  
376 (symbiont, photobiont in lichen) which again suggested presence of SL-related compounds in  
377 the alga. Exhausted medium probably also contains SL-related compounds. The cells  
378 exudates were concentrated on C18 column, eluated with acetone or ethyl acetate similar to  
379 Kohlen *et al.* (2011). Stress conditions in plants in view of SLs production exhibited increase  
380 of SLs production (Yoneyama *et al.*, 2012). Based on this knowledge we tested P-free culture  
381 of the *Trebouxia arboricola* (see Material and methods) on the efficiency in germination  
382 bioassay. Ethyl acetate optimized extract from *T.arboricola* P-free dry weight biomass led to

383 increase of germination rate in *P.aegyptiaca*. P-free medium cultivation and used extract i.e.  
384 the actual concentration of SLs in the applied sample, have the high significancy on the  
385 germination rate. Delaux *et al.* (2012) used three times extraction of fresh tissue (10 - 80g) of  
386 algae by acetone and the extract was dried and dissolved in ethyl acetate. Yoneyama *et al.*  
387 (2012) used the extraction of roots by acetone. Furthermore at both studies, the extracts were  
388 washed with 0.2M KH<sub>2</sub>PO<sub>4</sub>, dried over anhydrous MgSO<sub>4</sub> and concentrated in vacuo and  
389 stored at -20 °C for AMF bioassay and determination of SLs in extracts. In our procedure the  
390 first extraction was carried out with ethyl acetate, then the extract was evaporated to dryness  
391 and stored at -20 °C. Just before bioassay, the samples were dissolved in acetone and dilluted  
392 with sterile distilled water. SLs are acting at picomolar to nanomolar concentrations  
393 (Akiyama and Hayashi, 2006). Therefore the optimization of extraction procedure was tested  
394 in the bioassay with *P. aegyptiaca seeds*. Different dilutions of crude extracts were prepared.  
395 Starting from 5 ml of alga pelet, 3 ml of crude ethyl acetate extract was applied: in 10x  
396 dillution with acetone (extract 1), 10x diluted with water (extract 2), 2.5x concentrated  
397 (extract 3) and extract 3 was 10x diluted with water (extract 4). Extract 1 induced 4.70 ±  
398 5.74% germination of *P. aegyptiaca seeds*, extract 2 induced 4.73 ± 4.27% germination,  
399 extract 3 induced 7.83 ± 2.23% germination and extract 4 13.03 ± 8.01% germination. The  
400 controls of germination were 0.0 ± 0.0% (H<sub>2</sub>O) and 77.0 ± 6.79% (GR24, 0.01 mg.l<sup>-1</sup>). The  
401 observed increase in germination of seeds treated by the *Trebouxia arboricola* suggested in  
402 symbiotic microalgae SLs or SLs-like activity compound(s) production.

#### 403 *Roots analysis of Arabidopsis thaliana - in vitro bioassay*

404 The plants were grown in Murashige and Skoog medium (1962) in presence of crude extracts.  
405 We measured total length of roots, length of primary root and length of lateral roots of 8-days  
406 old plantlets of *Arabidopsis thaliana* after application of tested substances. Roots analysis  
407 (**Table 4**) documented the statistical significant biostimulation of *T. arboricola* crude extract  
408 in roots. The other crude extracts of dry lichen *Xanthoria parietina*, exhausted *T. arboricola*  
409 medium concentrated on C18 column and eluated by acetone, freshwater macroalga *Chara* sp.  
410 or freshwaterweed *Elodea canadensis* did not revealed any changes in measured parameters  
411 of roots. This bioassay also suggest presence of compounds with SL-like activity in the alga  
412 *T. arboricola*. Strigolactones, which are produced mainly by plant roots, affect plant root  
413 development and architecture via the control of cell division observed in wt *A. thaliana*  
414 (Koltai, 2011). Application of GR24 (10<sup>-6</sup>M) increases root hair elongation in wt *A. thaliana*

415 (Ruyter-Spira *et al.*, 2011), but not at higher concentration of GR24 in tomato (Koltai, 2011).  
416 Results of our study suggested the increase in length of primary and lateral roots and  
417 repression lateral adventitious root formation (total number of roots) in wt *A.thaliana* after  
418 application of extracts from *T. arboricola* pellet. The physiological effects correspond to the  
419 effect of GR24 application (Sun *et al.*, 2016).

420 *Germ tube branching bioassay on the AM fungus Gigaspora rosea, stimulation growth of*  
421 *fungi by Trebouxia arboricola.*

422 When AMF responds positively to the presence of algae extract, it is possible to predict the  
423 presence of SLs in the algae. The treatment of ethyl acetate crude extract of Charales alga  
424 *Nitella mucornata* and cyanobacteria *Cylindrospermum alatosporum* increased AMF spore  
425 germination (**Fig. 2A**). The treatment of acetone crude extract of lichens led to changes in the  
426 growth of mycelium of AMF *G. rosea* observed as increasing production of large mycelium  
427 (**Fig. 2B**). All of natural strigolactones are active as branching factor also in AMF *G. rosea*  
428 (Akiyama and Hayashi, 2006). There is further evidence that some algae and lichens (fungi or  
429 algae) can produce SLs or SLs-related compounds. As reported earlier, SLs stimulation  
430 effects on fungal hyphal growth in AMF (Besserer *et al.*, 2006, 2008) would probably exist in  
431 lichen symbionts. In lichens, SLs have been suggested as potential candidates for the  
432 photobiont-derived factor which induces hyphal branching of the mycobiont after the initial  
433 contact of alga and fungus (Harris, 2008). In lichens the fungi may be selecting very specific  
434 algal genotypes, while the algae are tolerant of many fungal partner (Piercey-Normore and  
435 DePriest, 2001). The hypothesis about existence of communication connecting with SL-  
436 related compounds between phycobiont (alga) and fungi needs to be further tested. Our  
437 preliminary data of the increased biomass of the culture beneficial fungi *Lecanicillium*  
438 *muscarium* in a presence of exhausted medium of *T. arboricola* supported the hypothesis  
439 about SLs production by the alga in the medium.

440 *Expression of SL-related markers - Ppccd8 mutant of Physcomitrella patens*

441 The *Physcomitrella patens* (moss) knockout mutant *Ppccd8* (Proust *et al.*, 2011) was used for  
442 our study as the response to SL (Proust *et al.*, 2011, Hoffmann *et al.*, 2014). On the  
443 **Supplementary Fig. S1** are shown the transcript levels in *Ppccd8* mutant of SL response  
444 marker genes PpCCD7 and Pp3c2\_34130v3.1, respectively 16 and 6h after application of  
445 acetone ac (control), 1  $\mu\text{mol.l}^{-1}$  GR24, alga *Trebouxia arboricola*, lichen *Xanthoria*  
446 *parientina*, exhausted culture medium of the alga *T. arboricola.*, T/10 and X/10. The results

447 suggested effects of the algae treatment on the expression level of the marker genes. Although  
448 the effect of GR24 on PpCCD7 transcript levels are significantly dampened by *Trebouxia*  
449 *arboricola* diluted extracts, as it is expected from SL compound (Hoffmann *et al.*, 2014).  
450 Diluted *Trebouxia*, *Xanthoria* and diluted *Trebouxia-P* extracts all led to an increase of the  
451 Pp3c2\_34130v3.1 gene transcript levels, as GR24. These results further indicated the  
452 presence of SLs-related compounds in microalga *Trebouxia arboricola* and lichen *Xanthoria*  
453 *parietina*.

454 Here, we present data indicating that symbiotic *Trebouxiophyceae* also produce SLs or SLs-  
455 related compounds, but we were unable to amplify CCD8 sequences from the genomic DNA  
456 for any screened algae due to limited genomic and transcriptomic data. Whital across  
457 screened 37 species of cyanobacteria for novel CCD genes used BLASTP, 5 CCD genes  
458 including *ccd8*-homologous gene in freshwater unicellular N<sub>2</sub>-fixing cyanobacteria  
459 *Cyanothece* sp.ATCC 51142 and more than 3 CCD genes including *ccd7*-homologous genes  
460 in filamentous cyanobacteria *Anabena* and *Nostoc* were identified (Cui *et al.* 2012). It is  
461 known, that both CCD7 and CCD8 were envolved due to the duplication of CCD1 genes in  
462 plant families, CCD genes should be functionally divergent from each other, the CCD7/8  
463 genes had greatest distance between the mosses (*P.patens*) and other angiosperm species  
464 (Priya *et al.*, 2014). The last fact could be the reason, why it was not possible to find suitable  
465 nucleotide sequences to find CCD8 in microalga *Trebouxia*. Cui *et al.* (2012) summarized  
466 hypothesis about *ccd7*-homologous genes origin in cyanobacteria, while *ccd8*-homologous  
467 genes were absent because of gene loss. Another possible hypothesis is the fact that  
468 microalgae, especially soil microalga and cyanobacteria, are considered as pioneers in settling  
469 the Earth's surface after, for example, a fire. This leads us to believe that these algae would  
470 still have unknown receptors, perhaps more similar to receptors for karrikins (Flematti *et al.*,  
471 2009).

#### 472 *Short-term pots experiments*

473 In first experiment the effects of crude extract of microalga *Trebouxia arboricola* and lichen  
474 *Xanthoria parientina* and ten times diluted samples (T/10 and X/10) on the outgrowth of the  
475 lateral bud after cutting the main stem were examined. Lateral growth restoration was  
476 determined by measuring of the length of the outgrowing lateral shoots in comparison to  
477 controls – with and without treatment of 1 μM GR24 (**Fig. 3**). The inhibition of branching in  
478 rms-1 branched phenotype was expected after applications of *Trebouxia* or *Xanthoria*,

479 respectively. The difference was very significant between control and GR24. Limit of  
480 significance between control and *Trebouxia* and between control and T/10, since the *p* value  
481 is superior to 0.05 but not far from it (\*). The most effective remains inhibition by synthetic  
482 stimulant GR24, functioned in the experiment as a auxine analog (full inhibition of outgrowth  
483 of lateral buds after cancellation of apical dominance). In plants, SLs production exhibited by  
484 declination of branching activity of shoots, ie inhibition of outgrowth of axillary buds  
485 (Umehara *et al.*, 2008, Kohlen *et al.*, 2011). This result assumes in the alga *Trebouxia* the  
486 existence of substances that have the same phenotypic response as the GR24 application.

487 *Mass Spectrometry Imaging of carlactone and its derivatives and fragments identification by*  
488 *using DART-HRMS*

489 Carlactone is being a key molecule in SLs biosynthesis (Seto *et al.*, 2014). DESI-MSI is a  
490 modern analytical technique that enables to measure real samples at ambient conditions,  
491 including highly troublesome analytes that are otherwise not easy to identify due to chemical  
492 changes during necessary sample preparation or extraction steps. To our knowledge, we  
493 present for the first time identification of carlactone and carlactone derivatives by this  
494 method. Our results present determination of  $\beta$ -apo-13-carotenone: carlactone, methyl  
495 carlactonoate, carlactonoic acid, 19-hydroxy carlactone and 19-oxo carlactone in green  
496 unicellular coccal microalga *Trebouxia* (free-cultivate cells). We found  $\beta$ -apo-13 carotenone,  
497 a second alternative to carlactone synthesis. 9-cis- $\beta$ -apo-10'-carotenal did not find, at least in a  
498 measurable area. It is possible to use it more for synthesis of carlactone and beta-apo-13  
499 carotenone is more measurable because its conversion to carlactone is slower. CCD8 (EC  
500 1.13.11.70) catalyzes conversion all-*trans*- $\beta$ -apo-10'-carotenal into  $\beta$ -apo-13-carotenone and  
501 this reaction is slower than that with *cis* isomer (Alder *et al.*, 2012). DESI-MSI images (see  
502 **Fig. 4A,B**) show the localisation of the above-given analytes in the cells of *Trebouxia*  
503 *arboricola* from the harvested culture grown on full culture medium (A); and in P-free  
504 medium (B). The relative ion intensity values corresponding the colour coding can be found  
505 in the bar on the right side. It is shown that short term P-free growth of *Trebouxia* culture led  
506 to increase of carlactones content in the cells. This result agrees with the previous study of  
507 Yoneyama *et al.* (2012). The result supports our hypothesis that there is CCD8 homologous  
508 gene. If the primary function of SLs is regulation of branching (Ruyter-Spira and  
509 Bouwmeester, 2012, Brewer *et al.*, 2013) that the CCD8 gene could assist in the alga in a  
510 symbiosis with fungi similar to animal-cyanobacterial symbiont *Cyanothece* sp. PCC7425



511 (Cui *et al.*, 2012). They reported that CCD8 enzymes are present in all eukaryotes including  
512 algae, while absent in all cyanobacteria except the symbiont (obtain of the gene by horizontal  
513 gene transfer or under selection during evolution). The identity of individual carlactone  
514 derivatives was validated both by the means of accurate mass and via other method, DART-  
515 HRMS. This method enables validation via fragmentation, the results are given in  
516 **Supplementary Table S1**, data were obtained from extract. By the means of the MassFrontier  
517 program, probable fragments of individual carlactone analytes were calculated according to  
518 the fragmentation rules were obtained. Occurrence of individual fragments was monitored in  
519 real samples. According to the obtained results, relatively good similarity was achieved  
520 between the theoretically calculated fragments and the determined ones. Values of the  
521 difference between measured and theoretical accurate mass varied in the range of 0.03 ppm –  
522 1.82 ppm. For the analytes that had already been studied in other matrices (carlactone,  
523 carlactonoic acid, methyl carlactonoate), comparison of fragmentation results was performed  
524 and the experimental data were found to be in a good accordance with previously published  
525 data (Seto *et al.*, 2014, Abe *et al.*, 2014, Brewer *et al.*, 2016).

#### 526 *Perspective of practical use of *Trebouxia arboricola* in pest management*

527 The growth of pea plants cv. Terno, which seeds were treated by algae homogenate, was  
528 positively affected by the application, by the arbuscular mycorrhizal fungi or the combined  
529 treatment - *Rhizophagus irregularis*, *Trebouxia arboricola* in second short-term experiment.  
530 All treatments had stimulation effects on growth characteristics, increase in length of stem  
531 and in number of nodes in the most efficient *T. arboricola* plus *R. irregularis*, suggesting that  
532 fungi colonization was probably positively affected by the algal treatment (**Table 5**).  
533 However the statistical analysis did not show statistically significant differences, especially  
534 because of high variability of control. SL levels in pea plant would need to be estimated, and  
535 the experiment should be tested in the presence of parasitic seeds (*P. aegyptiaca*), but it can  
536 already be concluded that *T. arboricola* application is not phytotoxic and has positive effects  
537 on AMF, which is important for the practical purposes.

538 There is accumulating evidence that microalgae (cyanobacteria and algae) like many other  
539 plants produce various phytohormones, also including SLs. This fact could be highly  
540 interesting from a practical point of view, offering a novel approach for parasitic plant  
541 management. Let us assume that *Trebouxia* cells in the artificial cultivation produce and  
542 release SL-related compounds into the environment or presence of another strigolactones

543 pathway. There is a vision to implement pilot studies that could verify the use of this  
544 biotechnology product in agriculture.

545

#### 546 **Supplementary Data**

547 Supplementary data are available at JXB online.

548 Table S1. DART-HRMS fragmentation analysis (positive mode) of carlactones in fresh  
549 samples of *Trebouxia* extract.

550 Fig. S1. Transcript levels of SL response marker genes PpCCD7 and Pp3c2\_34130v3.1 of  
551 mutant *Physcomitrella patens Ppccd8* after *Trebouxia* treatment.

552

553 **Acknowledgements:** The authors would like to thank Catherine Rameau (INRA,  
554 AgroParisTech, CNRS, Université Paris-Saclay, Route de St-Cyr 10, 780 26 Versailles  
555 Cedex, France), for providing buds outgrowth measurements on rms-1 (*ccd8*) mutant of pea.  
556 This study was supported by Grant Agency of MEYS, COST Action FA1206 of Czech  
557 Republic, no. LD14101, grant No. GA14-28933S from the Czech Science Foundation; by  
558 Scientific Grant Agency of the Ministry of Education of Slovak Republic and the Academy of  
559 Sciences (VEGA 2/0138/17); this article is based on work from COST Action FA1206  
560 (STREAM, “STRigolactones Enhances Agricultural Methodologies”), supported by COST  
561 (European Cooperation in Science and Technology); by Marie Curie European Re-integration  
562 Grant no.239343 and BW/L140-5-0406-0 from the University of Gdańsk.

## References:

**Abdel-Raouf N, Al-Homaidan AA, Ibraheem IBM.** 2012. Agricultural importance of algae. African Journal of Biotechnology **11**, 11648-11658.

**Abe S, Sado A, Tanaka K, Kisugi T, *et al.*** 2014. Carlactone is converted to carlactonic by MAX1 in *Arabidopsis* and its methyl ester can directly interact with AtD14 in vitro. Proceedings of the National Academy of Science **111**, 18084-18089.

**Ahrazem O, Gómez-Gómez L, Rodrigo MJ, Avalos J, Limón MC.** 2016. Carotenoid cleavage oxygenases from microbes and photosynthetic organisms: features and functions. review. International Journal of Molecular Sciences. doi:10.3390/ijms17111781.

**Akiyama K, Hayashi H.** 2006. Strigolactones: chemical signals for fungal symbionts and parasitic weeds in plant roots. Annals of Botany doi:10.1093/aob/mc1063.

**Alder A, Jamil M, Marzorati M, *et al.*** 2012. The path from beta-carotene to carlactone, a strigolactone-like plant hormone. Science **335**, 1348-1351.

**Ashton NW, Grimsley NH, Cove DJ.** 1979. Analysis of gametophytic development in the moss, *Physcomitrella patens*, using auxin and cytokinin resistant mutants. Planta **144**, 427-435.

**Bennett T, Liang Y, Seale M, Ward S, Müller D, Leyser O.** 2016. Strigolactone regulates shoot development through a core signalling pathway. Biol Open. pii: bio.021402.

**Beveridge CA, Dun EA, Rameau C.** 2009. Pea has its tendrils in branching discoveries spanning a century from auxin to strigolactones. Plant Physiology **151**, 985-990.

**Besserer A, Bécard G, Jauneau A, Roux Ch, Séjalon-Delmas N.** 2008. GR24, a synthetic analog of strigolactones, stimulates the mitosis and growth of the arbuscular mycorrhizal fungus *Gigaspora rosea* by boosting its energy metabolism. *Plant Physiology* **148**, 402-413.

**Besserer A, Puech-Pagès V, Kiefer P, *et al.*** 2006. Strigolactones stimulate arbuscular mycorrhizal fungi by activating mitochondria. *PLOS Biology* **4**, 1239-1247.

**Bouwmeester HJ, Roux C, Lopez-Raez JA, Bécard G.** 2007. Rhizosphere communication of plants, parasitic plants and AM fungi. *Trends in Plant Science* **12**, 224-230.

**Brewer PB, Koltai H, Beveridge ChA.** 2013. Diverse roles of strigolactones in plant development. *Molecular Plant* **6**, 18-28.

**Brewer PB, Yoneyama K, Filardo F, *et al.*** 2016. Lateral branching oxidoreductase acts in the final stages of strigolactone biosynthesis in *Arabidopsis*. *PNAS* **113**, 6301-6306.

**Chauchan SB, Mahajan G.** 2014. *Recent Advances in Weed Management*. Heidelberg: Springer, 315-345.

**Cook CE, Whichard LP, Turner B, Wall ME, Egley GH.** 1966. Germination of witchweed (*Striga lutea* Lour.): isolation and properties of a potent stimulant. *Science* **154**, 1189-1190.

**Cui H, Wang Y, Qin S.** 2012. Genomewide analysis of carotenoid cleavage dioxygenases in unicellular and filamentous cyanobacteria. *Comparative and Functional Genomics* doi: 10.1155/2012/164690.

**De Saint Germain A, Bonhomme S, Boyer F-D, Rameau C.** 2013. Novel insights into strigolactone distribution and signalling. *Current Opinion in Plant Biology* **16**, 583-589.

**De Saint Germain A, Clavé G, Badet-Denisot MA, *et al.*** 2016. An histidine covalent receptor and butenolide complex mediates strigolactone perception. *Nature Chemical Biology* **12**, 787-794.

**Delaux PM.** 2016. Comparative phylogenomics of symbiotic associations. *New Phytologist* doi: 10.1111/nph.14161.

**Delaux PM, Xie X, Timme RE, Puech-Pages V, Dunand C, Lecompte E, Delwiche CF, Yoneyama K, Bécard G, Sejalon-Delmas N.** 2012. Origin of strigolactones in the green lineage. *New Phytologist* **195**, 857-871.

**Domozych DS, Domozych CE.** 2014. Multicellularity in green algae: upsizing in a walled complex. *Front Plant Science* doi: 10.3389/fpls.2014.00649.

**Fergusson BJ, Beveridge ChA.** 2009. Role of auxin, cytokinin, and strigolactone in regulating shoot branching. *Plant Physiology* **149**, 1929-1944.

**Flematti GR, Ghisalberti EL, Dixon K, Trengove RD.** 2009. Identification of alkyl substituted 2H-furo[2,3-c]pyran-2-ones as germination stimulants present in smoke. *Journal of Agricultural and Food Chemistry* **57**, 9475-9480.

**Gomez-Roldan V, Fermas S, Brewer PB, Puech-Pagès V, *et al.*** 2008. Strigolactone inhibition of shoot branching. *Nature* **455**, 189-194.

**Hamiaux C, Drummond RS, Janssen BJ, Ledger SE, Cooney JM, Newcomb RD, Snowden KC.** 2012. DAD2 is an  $\alpha/\beta$  hydrolase likely to be involved in the perception of the plant branching hormone, strigolactone. *Current Biology* **22**, 2032-2036.

**Harris SD.** 2008. Branching of fungal hyphae: regulation, mechanisms and comparison with other branching systems. *Mycologia* **100**, 823-832.

**Heo Kim HS, Lee ChP.** 2013. New insight into the cleavage reaction of Nostoc sp. strain PCC7120 carotenoid cleavage dioxygenase in natural and nonnatural carotenoids. *Applied Environmental Microbiology* **79**, 3336-3345.

**Hoffmann B, Proust H, Belcram K, Labrune C, Boyer FD, Rameau C, Bonhomme S.** 2014. Strigolactones inhibit caulonema elongation and cell division in the moss *Physcomitrella patens*. PLoS One 9(6):e99206. doi: 10.1371.

**Hori K, Maruyama F, Fujisawa T, *et al.*** 2014. *Klebsormidium flaccidum* genome reveals primary factors for plant terrestrial adaptation. Nature Communication doi:10.1038/ncomms4978.

**Kohlen, W, Charnikova T, Liu Q, Bours R, Domagalska MA, Bequerie S, Verstappen F, Leyser O, Bouwmeester H, Ruyter-Spira C.** 2011. Strigolactones are transported through the xylem and play a key role in shoot architectural response to phosphate deficiency in nonarbuscular mycorrhizal host *Arabidopsis*. Plant Physiology **155**, 974–987.

**Koltai H.** 2011. Strigolactones are regulators of root development. New Phytologist **190**, 545-549.

**Li J, Li Ch, Smith SM.** 2017. Hormone Metabolism and Signaling in Plants. Academic Press. Published by Elsevier Ltd. ISBN: 978-0-12-811562-6.

**Lopez-Obando M, Conn CE, Hoffmann B, Bythell-Douglas R, Nelson DC, Rameau C, Bonhomme S.** 2016. Structural modelling and transcriptional responses highlight a clade of PpKAI2-LIKE genes as candidate receptors for strigolactones in *Physcomitrella patens*. Planta doi: 101007/s00425-016-2481-y.

**Matusova R, van Mourik T, Bouwmeester HJ.** 2004. Changes in the sensitivity of parasitic weed seeds to germination stimulants. Seed Science Research **14**, 335-344.

**Matusova R, Rani K, Verstappen Francel WA, Franssen MCR, Beale MH, Bouwmeester HJ.** 2005. The strigolactone germination stimulants of the plant-parasitic *Striga* and *Orobanch* sp. are derived from the carotenoid pathway. Plant Physiology **139**, 920-934.

**Murashige T, Skoog F.** 1962. A revised medium for rapid growth and bioassay with tobacco tissue culture. *Physiologia Plantarum* **15**, 473.

**Nelson DC, Scaffidi A, Dun EA, Waters MT, Flematti GR, Dixon KW, Beveridge CA, Ghisalberti EL, Smith SM.** 2011. F-box protein MAX2 has dual roles in karrikin and strigolactone signaling in *Arabidopsis thaliana*. *Proceedings of the National Academy of Science USA* 108:8897-8902. doi: 10.1073/pnas.1100987108.

**Nicholson TH, Schenck NC.** 1979. Endogonaceous mycorrhizal endophytes in Florida. *Mycologia* **71**, 178-198.

**Nisar N, Li L, Lu S, Khin NC, Pogson BJ.** 2015. Carotenoid metabolism in plant. *Molecular Plant* **8**, 68-2.

**Piercey-Normore M, DePriest P.** 2001. Algal switching among lichen symbioses. *American Journal of Botany* **88**, 1490-1498.

**Priya R, Siva R.** 2014. Phylogenetic analysis and evolutionary studie sof plant carotenoid cleavage dioxygenase gene. *Gene* **548**, 223-233.

**Proust H, Hoffmann B, Xie X, Yoneyama K, Schaefer DG, Yoneyama K, Nogue F, Rameau C.** 2011. Strigolactones regulate protonema branching and act as a quorum sensing-like signal in the moss *Physcomitrella patens*. *Development* **138**, 1531-1539.

**Rameau C, Bodelin C, Cadier D, Grandjean O, Miard F, Murfet IC.** 1997. New racemosus mutants at loci Rms1, Rms3 and Rms resulting from the mutation breeding program Versailles. *Pisum Genetics* **29**, 7-12.

**Ruyter-Spira C, Bouwmeester H.** 2012. Strigolactones affect development in primitive plants. The missing link between plants and arbuscular mycorrhizal fungi ? *New Phytologist* **195**, 730-733.

**Ruyter-Spira C, Kohlen W, Charnikowa T, *et al.*** 2011. Physiological effects of the synthetic strigolactone analog GR24 on root system architecture in *Arabidopsis*: another belowground role for strigolactones? *Plant Physiology* **155**, 721-734.

**Seto Y, Sado A, Asami K, Hanada K, Umehara M, Akiyama K, Yamaguchi S.** 2014. Carlactone is an endogenous biosynthetic precursor for strigolactones. *Proceedings of the National Academy of Science* **111**, 1640-1645.

**Sun H, Tao J, Gu P, Xu G, Zhang Y.** 2016. The role of strigolactones in root development. *Plant Signaling and Behavior* doi: 10.1093/aob/mcv052.

**Umehara M, Hanada A, Yoshida S, *et al.*** 2008. Inhibition of shoot branching by new terpenoid plant hormones. *Nature* **455**, 195-200.

**Walter HM, Strack D.** 2011. Carotenoids and their cleavage products: Biosynthesis and functions. *Nature Product Reports* **28**, 663-692.

**Yao R, Ming Z, Yan L, *et al.*** 2016. DWARF14 is a non-canonical hormone receptor for strigolactone. *Nature* **536**, 469-473.

**Yoneyama K, Xie X, Kim HI, Kisugi T, Nomura T, Sekimoto H, Yokota T, Yoneyama K.** 2012. How do nitrogen and phosphorus deficiencies affect strigolactone production and exudation ? *Planta* **235**, 1197-1207.

**Yoneyama K, Xie X, Kusumoto D, Sekimoto H, Sugimoto Y, Takeuchi Y, Yoneyama K.** 2007. Nitrogen deficiency as well as phosphorus deficiency in *Sorghum* promotes the production and exudation of 5-deoxystrigol, the host recognition signal for arbuscular mycorrhizal fungi and root parasites. *Planta* **227**, 125-132.

**Zachleder V, Šetlík I.** 1982. Effect of irradiance on the course of RNA synthesis in the cell cycle of *Scenedesmus quadricauda*. *Biologia Plantarum* **24**, 341-353.



**Zwanenburg B, Pospíšil T.** 2013. Structure and activity of strigolactones: new plant hormones with a rich future. *Pest Management Science* **65**, 478-491.

## FIGURES

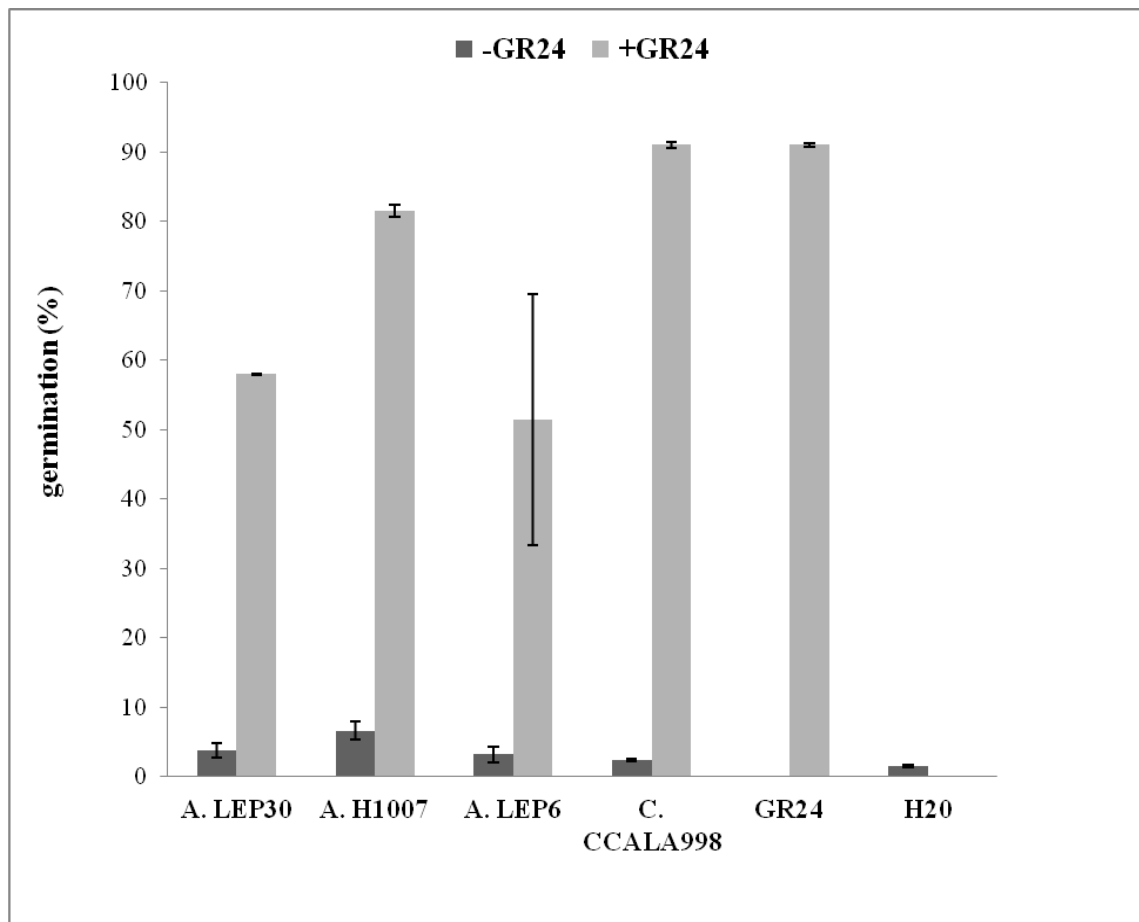

**Fig. 1.** Germination of *Phelipanche aegyptiaca* seeds. Ethyl acetate crude extracts of green algae - *Asterochloris* sp. strain LEP30, *A. excentrica*, strain H1007, *A. sp.* strain LEP6 and blue-green alga - *Cylindrospermum alatosporum* strain CCALA998 were applied on preconditioned seeds. Extract treatments 7<sup>th</sup> days and evaluation of germination rate in %. After 7 days GR24 ( $100 \mu\text{mol.l}^{-1}$ ) treatment to the tested algae restored the germination bioactivity. Values are mean  $\pm$  SD of 2 replicates.

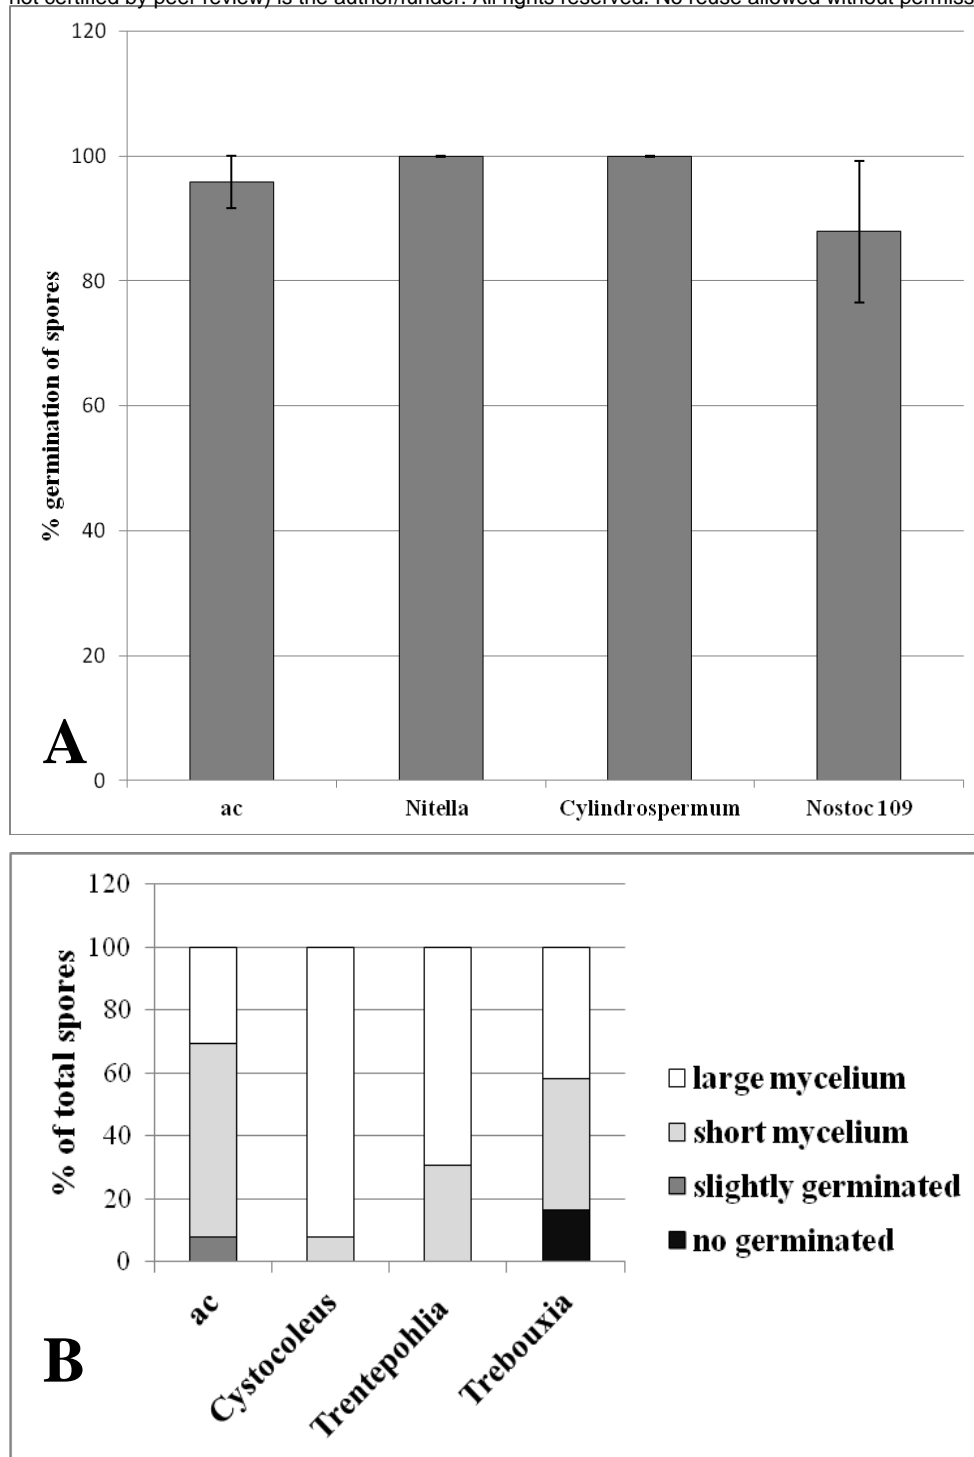

**Fig. 2.** Germination of spores and growth of mycelium of AMF *Gigaspora margerita* effected by **A)** acetone extract of Charales: *Nitella mucornata* and blue-green algae: *Cyndrospermum alatosporum* (dw 0.23g); *Nostoc* sp. strain 109 (dw 0.22 g) and by **B)** acetone extract of lichens natural dry samples: *Cystocoleus ebenus* (dw 0.25 g), *Trebouxia* (dw 1.0 g) and free-living alga *Trentepohlia* sp. (dw 0.25 g). Values are mean  $\pm$  SD of 6 replicates.

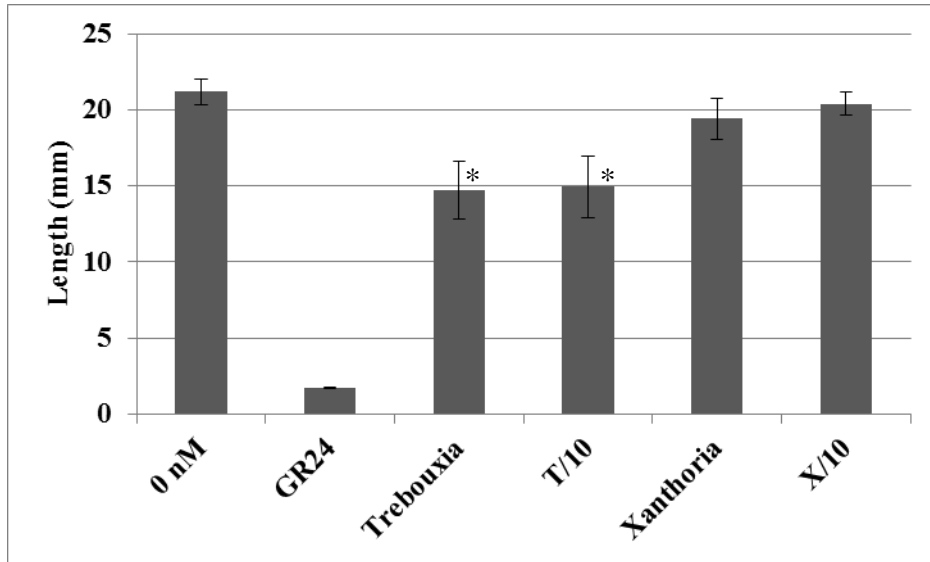

**Fig. 3.** Effects of crude extract of microalgae and lichen on the outgrowth of the lateral bud after cutting. Lateral growth restoration was determined by measuring as the length of the outgrowing lateral shoots. Crude extracts of *Trebouxia arboricola* (Trebouxia), 10x diluted extract of *T. arboricola* (T/10), *Xanthoria parietina* (Xanthoria), 10x diluted extract of *X. parietina* (X/10), 1 $\mu$ M GR24 as a positive control and physiological buffer (0 nM - containing 2% PEG, 50% ethanol, 0.4% DMSO, 0.1% acetone) were used. Values are mean  $\pm$  SD of 20 replicates. (\*) indicate statistically significant differences from control (0 nM) according to Kruskal-Wallis test ( $P < 0.05$ , for *Trebouxia*  $P=0.019$ , for T/10  $P=0.02$ ).

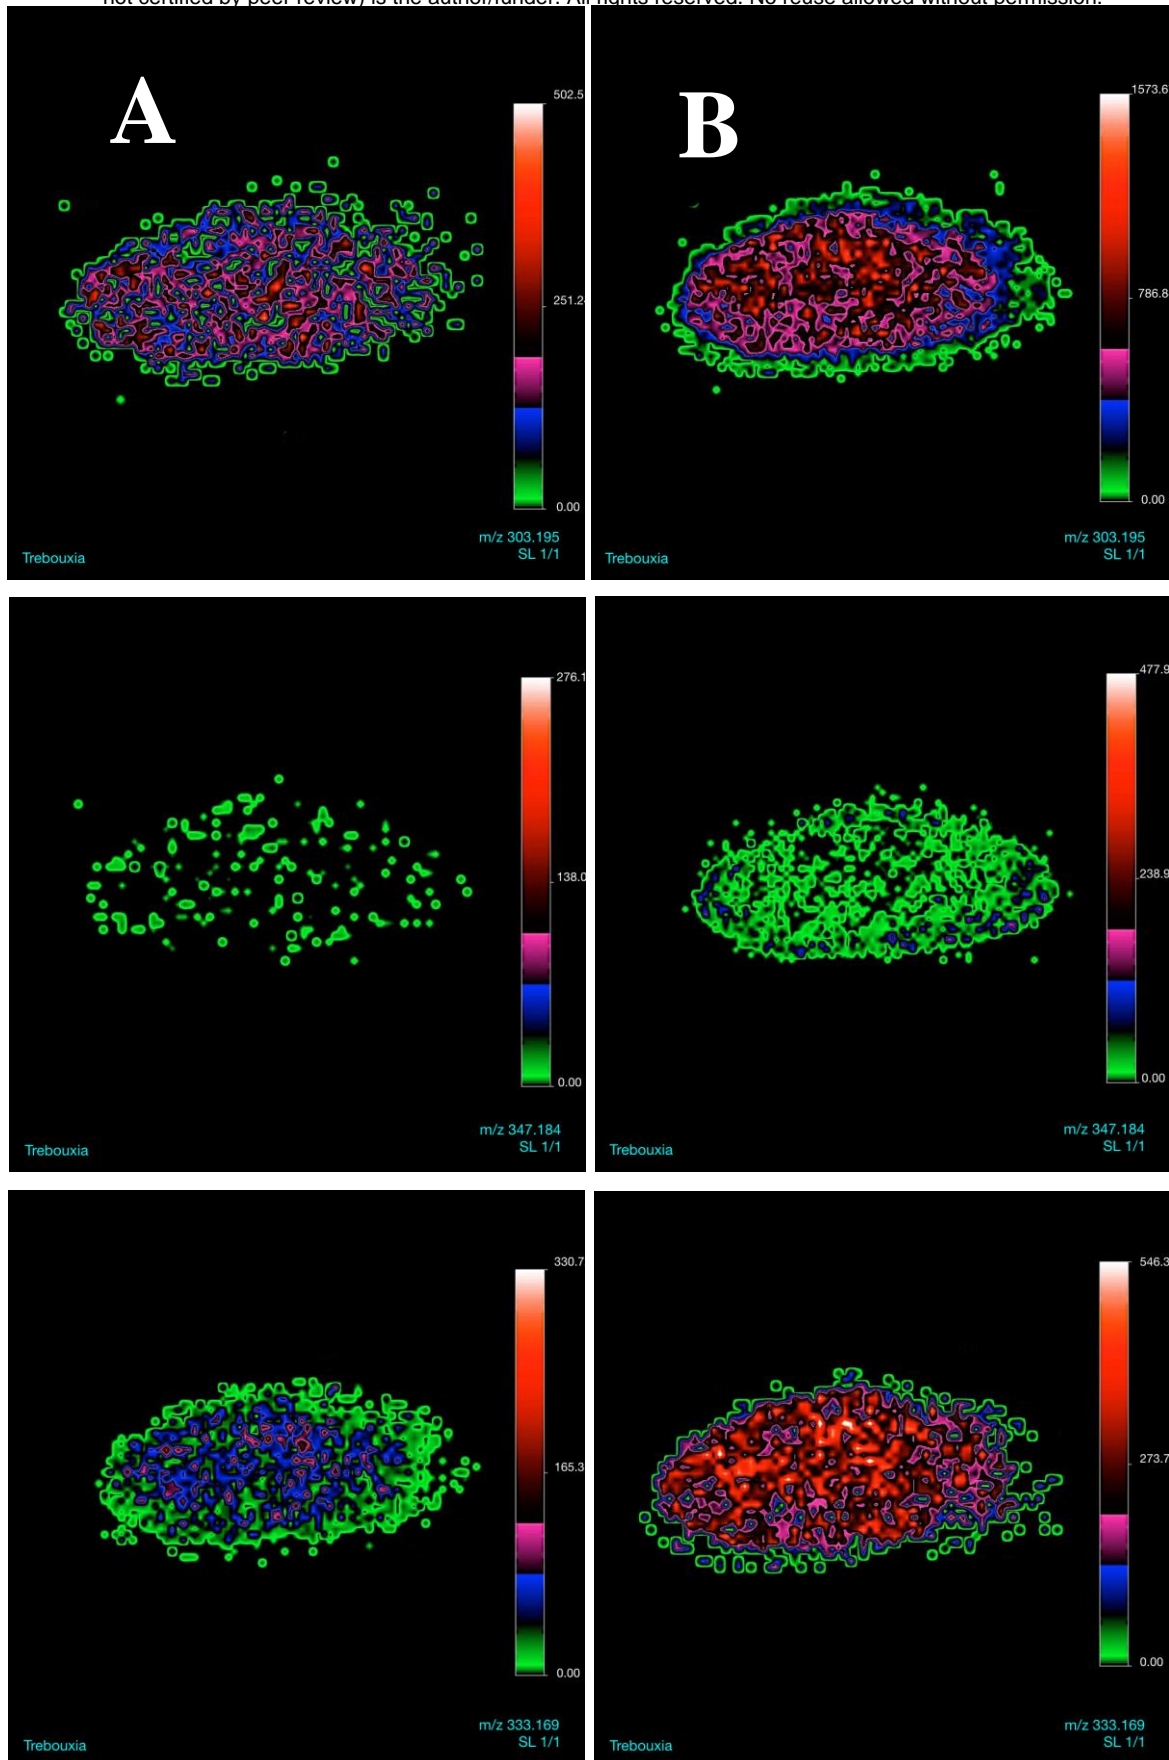

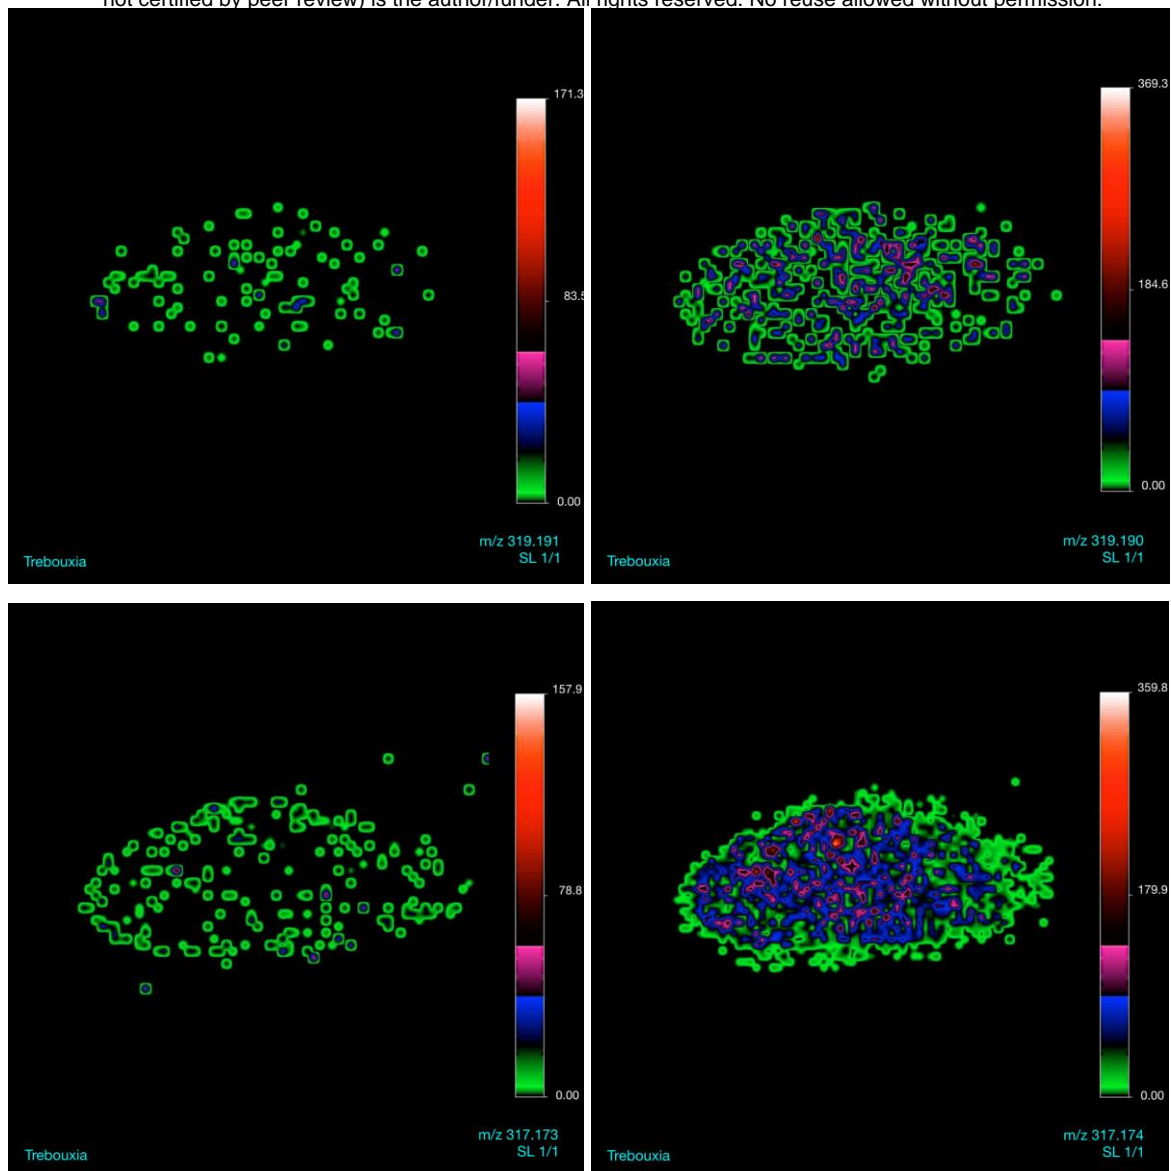

**Fig. 4** DESI-MSI imaging (positive mode) of carlactones in cells of *Trebouxia* **A:** *Trebouxia* cultivated on media with full strength ; **B:** *Trebouxia* was grown on P-free medium before imaging. Images show the localisation of ions:  $m/z$  303.195 (carlactone),  $m/z$  347.184 (methyl carlactonate),  $m/z$  333.169 (carlactonoic acid),  $m/z$  319.191 (19-hydroxy carlactone ),  $m/z$  317.173 (19-oxo carlactone).

TABLES

**Table 1.** The germination of *Phelipanche aegyptiaca* seeds, induced by crude ethyl acetate extracts of selected microalgae macroalgae and freshwater plant (screening). In bold – filamentous or branched type alga. Stimulating germination bioactivity of tested alga extract > H<sub>2</sub>O (negative control); 0.001 mg.l<sup>-1</sup> GR24 (positive control). Germination seeds in %.

| <b>Blue-green alga</b> | no activity                                                                                                                                                     | stimulating activity                                                                                      | <b>Macroalga</b> | stimulating activity                                                                       |
|------------------------|-----------------------------------------------------------------------------------------------------------------------------------------------------------------|-----------------------------------------------------------------------------------------------------------|------------------|--------------------------------------------------------------------------------------------|
| Cyanophyceae           | <i>Amorphonostoc</i> sp.<br><i>Anabaena variabilis</i><br><i>A. elipsosporum</i><br><i>Calothrix</i> sp.<br><i>Leptolyngbia</i> sp.<br><i>Fisleriella</i> sp.   | <i>Cylindrospermum alatosporum</i><br>(soil)<br>(17% ethyl acetate)                                       | Ulvophyceae      | <i>Cladophora</i> sp.<br>(45% ethyl acetate)<br><i>Ulva lactuca</i><br>(32% ethyl acetate) |
| Nostocaceae            | <i>Nostoc muscorum</i><br><i>N. ellipsosporum</i><br><i>N. linckia f. piscinale</i><br><i>N. calcicola</i><br><i>N. commune</i><br><i>Trichormus variabilis</i> | <i>N. commune</i> (symbiont with GUNNERA)<br>(2.5% ethyl acetate)                                         | Fucaceae         | <i>Cystoseira</i> sp.<br>(28% ethyl acetate)                                               |
| Oscillatoriaceae       | <i>Oscillatoria limosa</i>                                                                                                                                      |                                                                                                           | Gracilariaceae   | <i>Gracilaria dura</i><br>(49% ethyl acetate)<br><i>G. bornea</i><br>(34% ethyl acetate)   |
| Phormidiaceae          | <i>Phormidium cruentum</i><br><i>Symploca thermalis</i>                                                                                                         |                                                                                                           | Charophyceae     | <i>Chara</i> sp.<br>(29% ethyl acetate)                                                    |
| Chroococcales          | <i>Synechocystis</i> sp.                                                                                                                                        |                                                                                                           | Bryopsidales     | <i>Codium</i> sp.<br>(13% ethyl acetate)                                                   |
| <b>Microalga</b>       |                                                                                                                                                                 |                                                                                                           | Hydrocharitaceae | <i>Elodea</i> sp.<br>(35% ethyl acetate)                                                   |
| Trebouxiaceae          | <i>Microthamnion strictissimum</i><br><i>Stichococcus bacillaris</i>                                                                                            | <i>Asterochloris</i> sp., <i>Trebouxia arboricola</i> , <i>T. erici</i> (symbiont)<br>(33% ethyl acetate) | <b>Lichen</b>    | <i>Xanthoria parietina</i><br>(56% acetone),<br>(13% ethyl acetate)                        |
| Trentepohliaceae       |                                                                                                                                                                 | <i>Trentepohlia aurea</i> (32% ethyl acetate)                                                             |                  |                                                                                            |
| Chlorophyceae          |                                                                                                                                                                 | <i>Chlamydomonas reinhardtii</i><br>(26% ethyl acetate)                                                   |                  |                                                                                            |
| Chlorococaceae         | <i>Chlorococcum</i> sp.                                                                                                                                         |                                                                                                           |                  |                                                                                            |
| Eustigmatophyceae      | <i>Trochodiscus</i> sp.<br><i>Vicheria</i> sp.<br><i>Nanochloropsis</i> sp.                                                                                     | <i>Eustigmatos</i> sp. (symbiont with <i>Chara</i> , water)<br>(37% ethyl acetate)                        |                  |                                                                                            |
| Haematophyceae         | <i>Haematococcus pluvialis</i>                                                                                                                                  |                                                                                                           |                  |                                                                                            |
| Chlorophyta            | <i>Chlorogloea</i> sp.                                                                                                                                          |                                                                                                           |                  |                                                                                            |
| Klebsormidiaceae       | <i>Chlorokybus atmophyticus</i><br><i>Klebsormidium flaccidum</i>                                                                                               |                                                                                                           |                  |                                                                                            |
| Tribonemaceae          | <i>Tribonema vulgare</i>                                                                                                                                        |                                                                                                           |                  |                                                                                            |
| Scenedesmaceae         | <i>Coleastrum</i> sp.<br><i>Scotiellopsis terrestris</i>                                                                                                        |                                                                                                           |                  |                                                                                            |

**Table 2.A.** Germination of *Phelipanche aegyptiaca* seeds induced by crude extracts of algae.

Algae were extracted in 70% methanol, acetone and ethyl acetate. Germination (%) of crude extracts and extracts 10x diluted (\*), H<sub>2</sub>O was used as a negative control (12.5±4.2%) and 0.001 mg.l<sup>-1</sup> GR24 as a positive control (75.0±4.0%); nd - not determined. Germination seeds in %.

| Extraction               | <i>Cladophora</i> | <i>Codium</i>   | <i>Gracillaria<br/>dura</i> | <i>Cystosteira</i> | <i>Ulva<br/>lactuca</i> | <i>Xanthoria<br/>parietina</i> | <i>Trenthepohlia</i> |
|--------------------------|-------------------|-----------------|-----------------------------|--------------------|-------------------------|--------------------------------|----------------------|
| <b>70%<br/>methanol</b>  | <                 | <               | <                           | nd                 | <                       | nd                             | nd                   |
| <b>acetone</b>           | nd                | nd              | nd                          | <                  | nd                      | 55.9%<br>*55.7%                | <                    |
| <b>ethyl<br/>acetate</b> | 19.2%<br>*45.2%   | 13.8%<br>*16.7% | 19.4%<br>*48.8%             | 15.2%<br>*28.4%    | 34.2%<br>*28.1%         | <<br>*16.7%                    | 23.6%<br>*32.1%      |

**Table 2.B.** Induction of germination of *Phelipanche aegyptiaca* seeds by macroalga *Chara* sp. (33gfw/45ml) and freshwaterweed *Elodea canadensis* (47gfw/70ml) crude extracts (ethyl acetate). Germination seeds in %, mean±SD.

| Organism                      | Crude extract | Crude extract (10x diluted) |
|-------------------------------|---------------|-----------------------------|
| <i>Chara</i>                  | 8.2±5.4       | 16.7±14.4                   |
| <i>Elodea</i>                 | 16.7±14.7     | 15.3±16.2                   |
| H <sub>2</sub> O              | 6.6±0.1       |                             |
| 0.001 mg.l <sup>-1</sup> GR24 | 75.0±4.0      |                             |



**Table 3.** Stimulation activity in the selected group of *Trebouxiophyceae* algae for germination bioassays with *Phelipanche* spp.. Optimization of preparation extract of alga *Trebouxia arboricola* (ethylacetate:5mlfw/6ml for both *P.* spp.) and extract of cultivation medium (ethylacetate:1000mgdw/8ml). Optimization of cultivation by P-free medium in stationary phase of growth - extract of alga *T. arboricola* (ethylacetate:360mgdw/8ml). Extract of lichen *Xanthoria parietina* (ethylacetate:1000mgdw/9ml). Germination seeds in %, mean±SD.

| Testing agent                 | <i>P. aegyptiaca</i> | 10x dilution | Testing agent                | <i>P. ramosa</i> | dilution |
|-------------------------------|----------------------|--------------|------------------------------|------------------|----------|
| <i>Trebouxia</i>              | 7.2±0.4              | 42.5±9.2     | <i>Trebouxia</i>             | 18.6±1.4         | 9.0±3.6  |
| medium <i>Trebouxia</i>       | 4.2±5.9              | 11.5±3.5     | H <sub>2</sub> O             | 3.6±3.4          | -        |
| <i>Trebouxia</i> -P           | 19.4±0.6             | 11.8±0.3     | 0.01 mg.l <sup>-1</sup> GR24 | 96.3±0.1         | -        |
| <i>Xanthoria</i>              | 20.1±3.4             | 10.0±2.5     |                              |                  |          |
| H <sub>2</sub> O              | 6.0±0.6              | -            | -                            | -                | -        |
| 0.001 mg.l <sup>-1</sup> GR24 | 71.3±3.8             | -            | -                            | -                | -        |

**Table 4.** Evaluation roots of 8-days old seedlings of *Arabidopsis thaliana* (wt, Col-0) growing in ½ MS medium (half strength of Murashige and Skoog medium) with crude extracts of *Trebouxia arboricola* pellet, exhausted cultivation medium of *T. arboricola*, biomass of freshwater macroalga *Chara* sp., biomass of freshwater higher water plant *Elodea* sp. and lichen *Xanthoria parietina*. Evaluated parameters by image analysis: TL – total length of roots; T – total number of roots; PL – length of primary root; LL – length of lateral roots. Mean values ±SD marked with distinct letters differ significantly one another according to Tukey’s test ( $p < 0.05$ ).

| Sample                  | TL[mm]                   | T       | PL[mm]                  | LL[mm]   |
|-------------------------|--------------------------|---------|-------------------------|----------|
| CONTROL                 | 38.89±7.8 <sup>abc</sup> | 4.6±1.7 | 27.7±2.7 <sup>c</sup>   | 11.2±6.3 |
| <i>Trebouxia</i>        | 45.68±9.8 <sup>ab</sup>  | 4.1±0.9 | 32.6±3.2 <sup>ab</sup>  | 13.1±9.2 |
| <i>Xanthoria</i>        | 36.69±9.0 <sup>bc</sup>  | 4.3±1.9 | 22.8±11.0 <sup>cd</sup> | 13.9±6.8 |
| medium <i>Trebouxia</i> | 32.77±6.8 <sup>c</sup>   | 4.6±1.4 | 22.7±4.3 <sup>d</sup>   | 10.0±5.3 |
| <i>Chara</i>            | 33.72±4.3 <sup>c</sup>   | 3.5±1.6 | 25.0±7.9 <sup>cd</sup>  | 8.7±8.8  |
| <i>Elodea</i>           | 33.49±11.7 <sup>c</sup>  | 4.1±2.5 | 24.7±5.9 <sup>cd</sup>  | 8.8±7.8  |

**Table 5.** Evaluation of growth of pea plants (*Pisum sativum* L., cv. TERNO) after seeds treatment by alga water homogenate or in combination with arbuscular mycorrhizal fungus in pots experiment. Treatments: *Trebouxia arboricola* (T); *Rhizophagus irregularis* (R). There are not significant differences among the mean values in the table ( $p > 0.05$ ).

| <b>Treatment</b>   | <b>number of nodes</b> | <b>fw of shoots per plant (g)</b> | <b>dw of shoots per plant (g)</b> | <b>length of plant (cm)</b> |
|--------------------|------------------------|-----------------------------------|-----------------------------------|-----------------------------|
| CONTROL            | 8.3±1.7                | 1.9±0.7                           | 0.215±0.035                       | 22.63±6.23                  |
| <i>Trebouxia</i>   | 9.2±0.4                | 2.1±0.5                           | 0.218±0.047                       | 25.75±2.74                  |
| <i>Rhizophagus</i> | 8.4±1.4                | 2.0±0.8                           | 0.220±0.051                       | 25.18±6.54                  |
| <i>R + T</i>       | 8.8±0.4                | 2.0±0.8                           | 0.290±0.014                       | 25.17±3.88                  |
